# Supplementary material for: Morphology and thermal properties of novel clay-based poly(ethylene 2,5-furandicarboxylate) (PEF) nanocomposites
Source: Royal Society of Chemistry journal article supplement (doi:10.1039/c6ra09114h), 2016-01-01
Supplement: c6ra09114h1.pdf [file c6ra09114h1.pdf]

**Morphology and thermal properties of novel clay-based Poly (ethylene 2,5-  
furandicarboxylate) (PEF) nanocomposites**

Lucrezia Martino,<sup>a\*</sup> Volga Niknam,<sup>a</sup> Nathanaël Guigo,<sup>a</sup> Jesper Gabriël van Berkel,<sup>b</sup> Nicolas  
Sbirrazzuoli<sup>a</sup>

<sup>a</sup>*Université Nice Sophia Antipolis, CNRS, Laboratoire de Physique de la Matière Condensée  
(LPMC), UMR 7336, 06100, Nice, France*

<sup>b</sup>*Avantium Chemicals B.V., Zekeringstraat 29, 1014 BV, Amsterdam, The Netherlands*

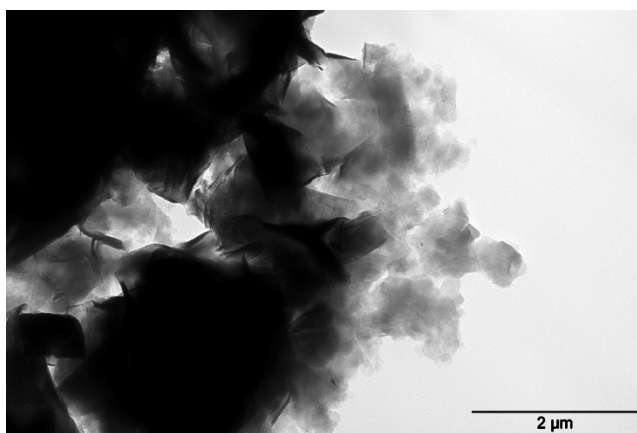

Figure S1. TEM images of OMMT clays dispersed in HFIP by magnetic stirring.

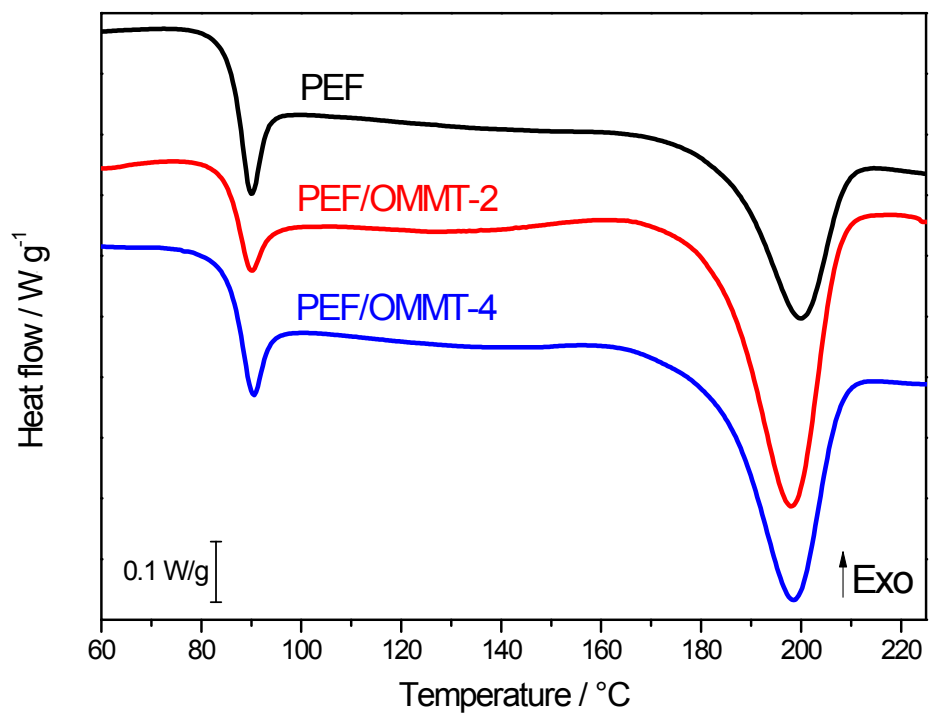

Figure S2. DSC heating curves of the neat PEF and PEF/OMMT nanocomposites at 20 °C min<sup>-1</sup> obtained after cooling from the melt at 2 °C min<sup>-1</sup>.

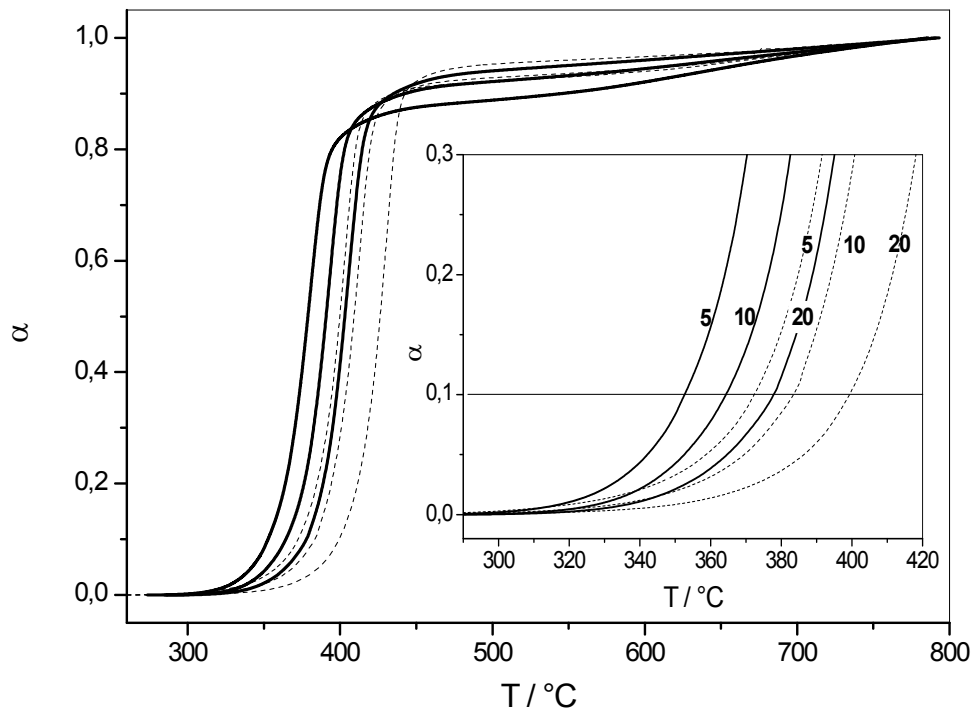

Figure S3. Extent of decomposition ( $\alpha$ ) as function of temperature for the neat PEF (continuous lines) and the PEF/OMMT-4 (dashed lines). The heating rate ( $^\circ\text{C min}^{-1}$ ) is indicated on the curves.
